# Supplementary material for: The Efficacy of Cardiac Anti-miR-208a Therapy Is Stress Dependent
Source: PubMed Central journal article supplement (PMC5363185; doi:10.1016/j.ymthe.2017.01.012), 2017-02-12
Supplement: mmc1.pdf [file mmc1.pdf]

**YMTHE, Volume 25**

## **Supplemental Information**

### **The Efficacy of Cardiac Anti-miR-208a**

#### **Therapy Is Stress Dependent**

**Joep E.C. Eding, Charlotte J. Demkes, Joshua M. Lynch, Anita G. Seto, Rusty L. Montgomery, Hillary M. Semus, Aimee L. Jackson, Marc Isabelle, Stefano Chimenti, and Eva van Rooij**

Figure S1

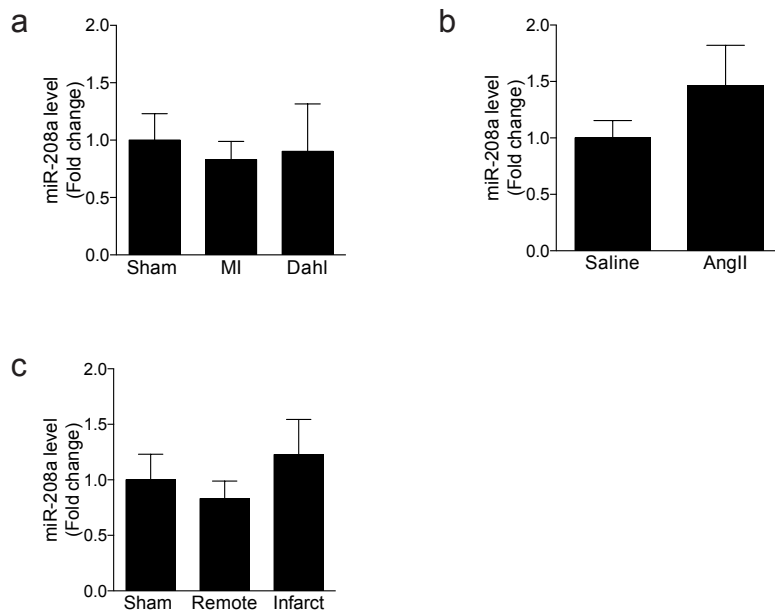

**Figure S1.** Real-time PCR analysis for miR-208a on LV tissue in **(a)** sham rats, MI rats and Dahl rats, **(b)** saline- and AngII-infused rats, **(c)** sham-operated rats (Sham) or different regions of MI-operated rats (Remote, Infarct). Data are expressed as mean fold change  $\pm$  SEM for Sham control (n=6), MI control (n=18), Dahl control (n=6), saline control (n=6), AngII control (n=6), MI remote control (n=18) and MI infarct control (n=19).

Figure S2

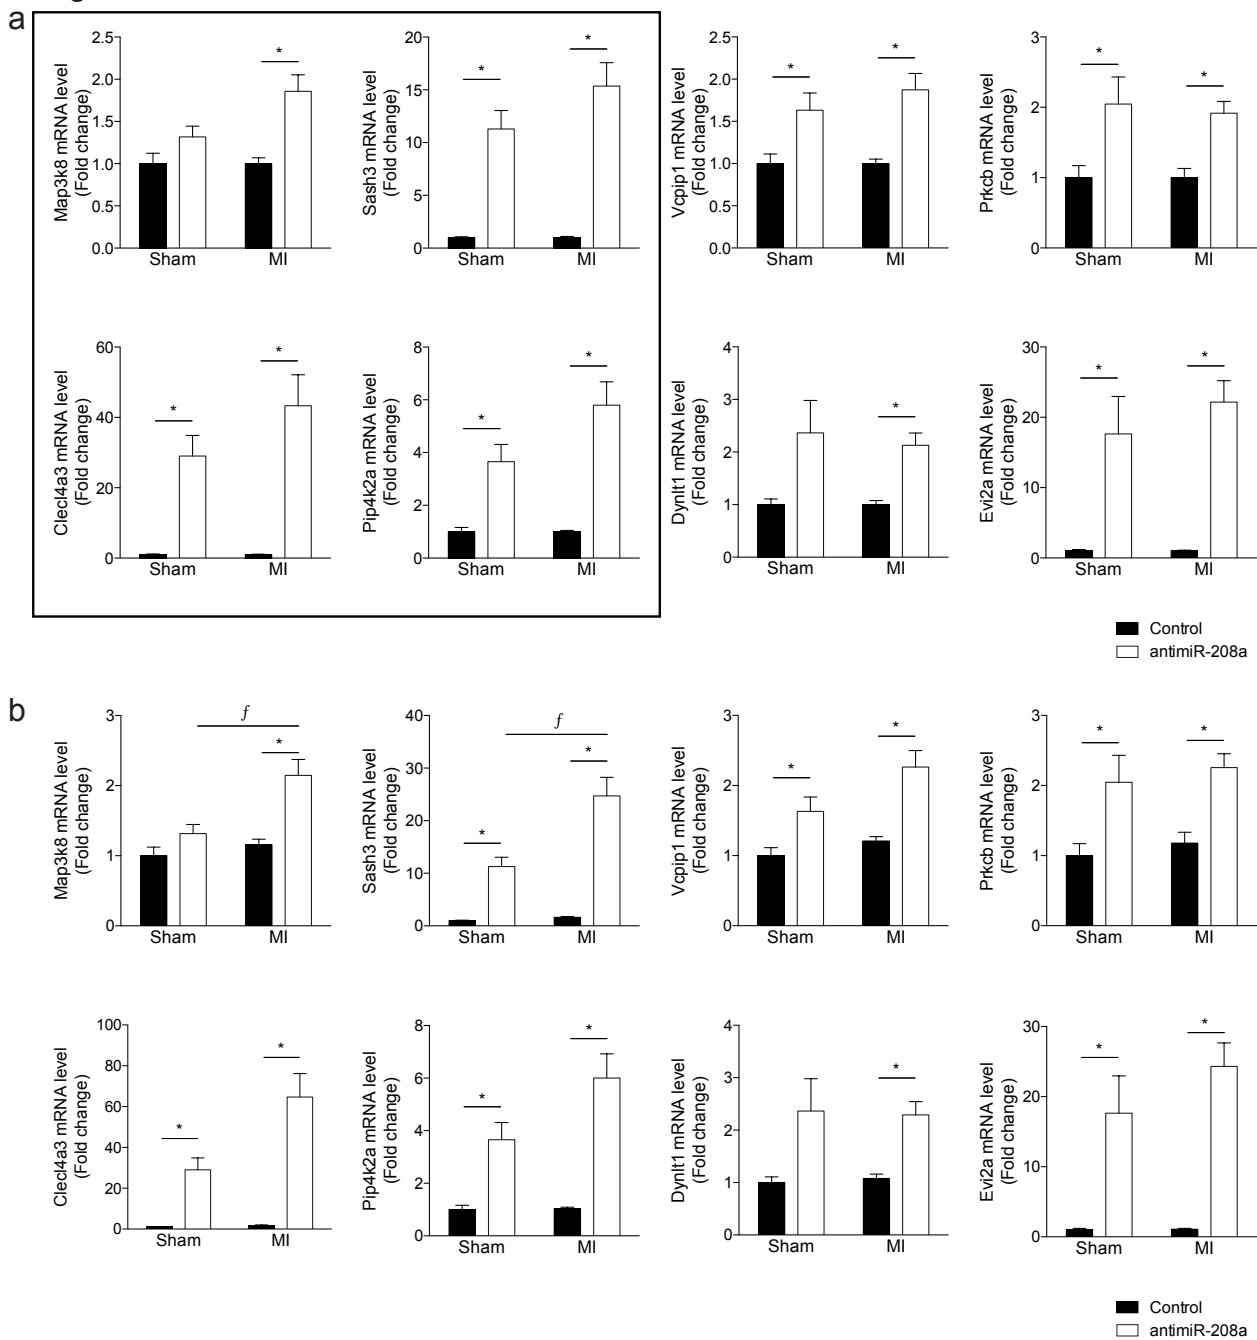

**Figure S2.** Real-time PCR analysis of miR-208a targets shown to be upregulated by gene array after anti-miR-208a treatment in both MI and sham surgery. **(a)** Data are expressed as mean fold change  $\pm$  SEM for Sham anti-miR-208a (n=6) over Sham control (n=6) and MI anti-miR-208a (n=16-17) over MI control (n=18-19). **(b)** Data are expressed as mean fold change  $\pm$  SEM for Sham anti-miR-208a (n=6), MI control (n=18-19) and MI anti-miR-208a (n=16-17) over Sham control (n=6). \* indicates  $p < 0.05$  for anti-miR-208a treatment versus control treatment; *f* indicates  $p < 0.05$  for anti-miR-208a treatment between models. Boxed graphs are shown in main figure 1d.

Figure S3

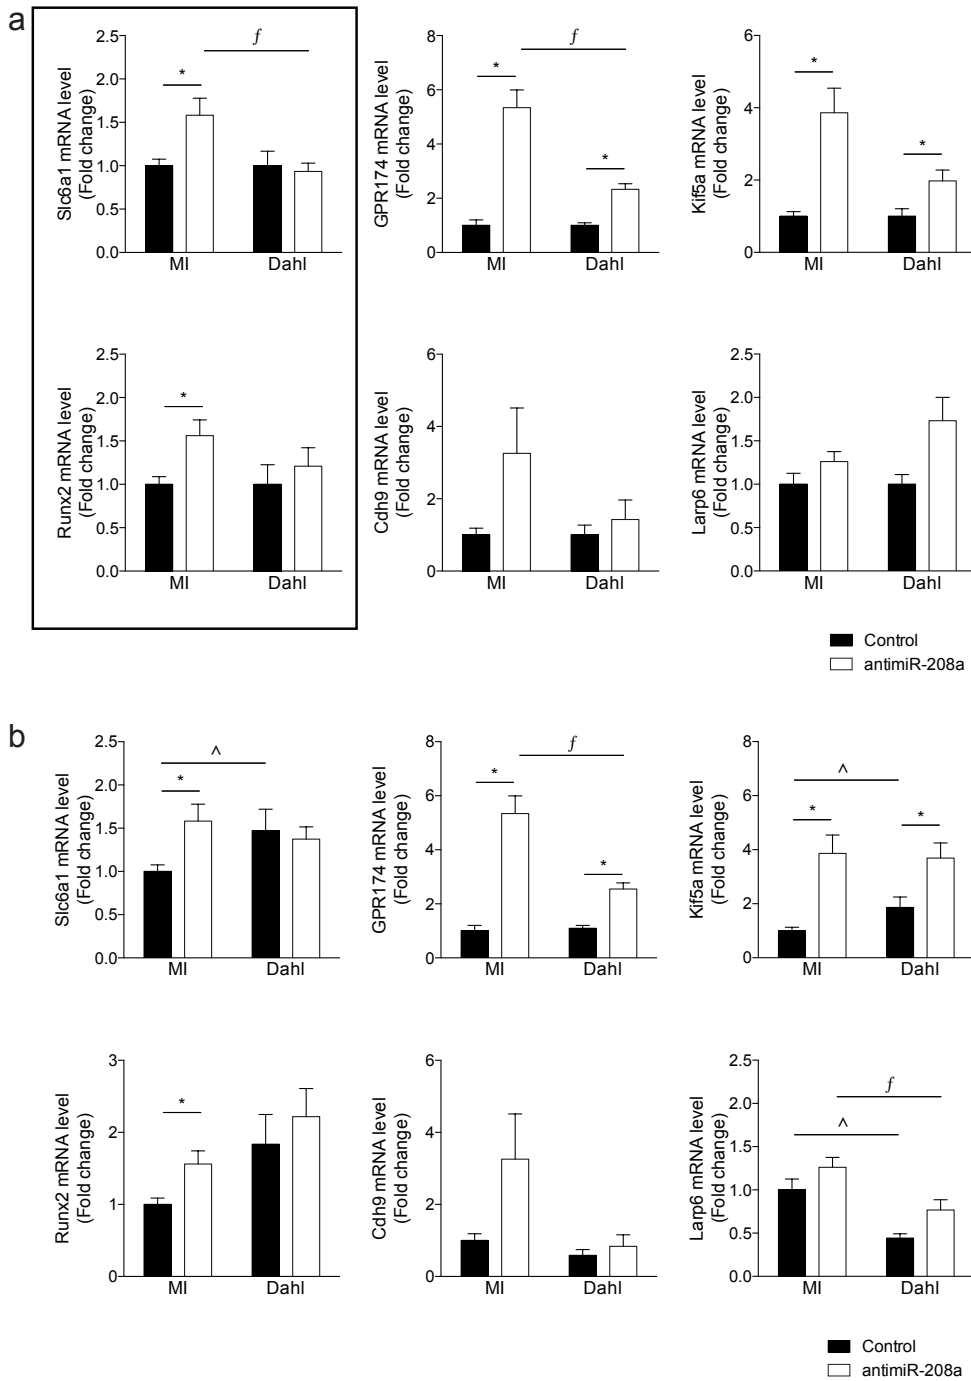

**Figure S3.** Real-time PCR analysis of miR-208a targets shown to be upregulated by gene array after anti-miR-208a treatment after MI surgery but not in Dahl rats. **(a)** Data are expressed as mean fold change  $\pm$  SEM for MI anti-miR-208a (n=16-17) over MI control (n=18-19) and Dahl anti-miR-208a (n=6-7) over Dahl control (n=5-6). **(b)** Data are expressed as mean fold change  $\pm$  SEM for MI anti-miR-208a (n=16-17), Dahl control (n=5-6) and Dahl anti-miR-208a (n=6-7) over MI control (n=18-19). \* indicates  $p < 0.05$  for anti-miR-208a treatment versus control treatment; ^ indicates  $p < 0.05$  for control treatment between models; *f* indicates  $p < 0.05$  for anti-miR-208a treatment between models. Boxed graphs are shown in main figure 2d.

Figure S4

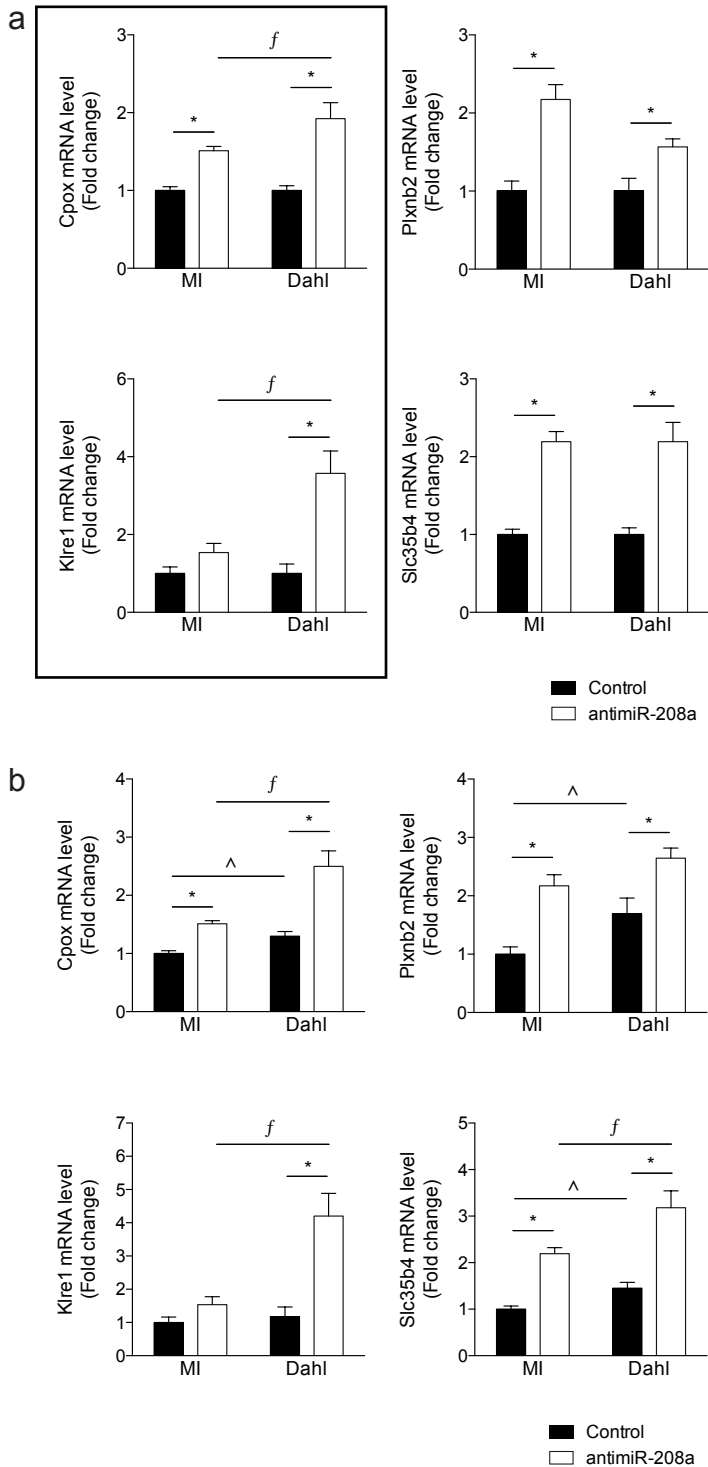

**Figure S4.** Real-time PCR analysis of miR-208a targets shown to be upregulated by gene array after anti-miR-208a treatment in Dahl rats, but not after MI surgery. **(a)** Data are expressed as mean fold change  $\pm$  SEM for MI anti-miR-208a (n=15) over MI control (n=16-19) and Dahl anti-miR-208a (n=6-7) over Dahl control (n=5-6). **(b)** Data are expressed as mean fold change  $\pm$  SEM for MI anti-miR-208a (n=15), Dahl control (n=5-6) and Dahl anti-miR-208a (n=6-7) over MI control (n=16-19). \* indicates  $p < 0.05$  for anti-miR-208a treatment versus control treatment; ^ indicates  $p < 0.05$  for control treatment between models; *f* indicates  $p < 0.05$  for anti-miR-208a treatment between models. Boxed graphs are shown in main figure 2e.

Figure S5

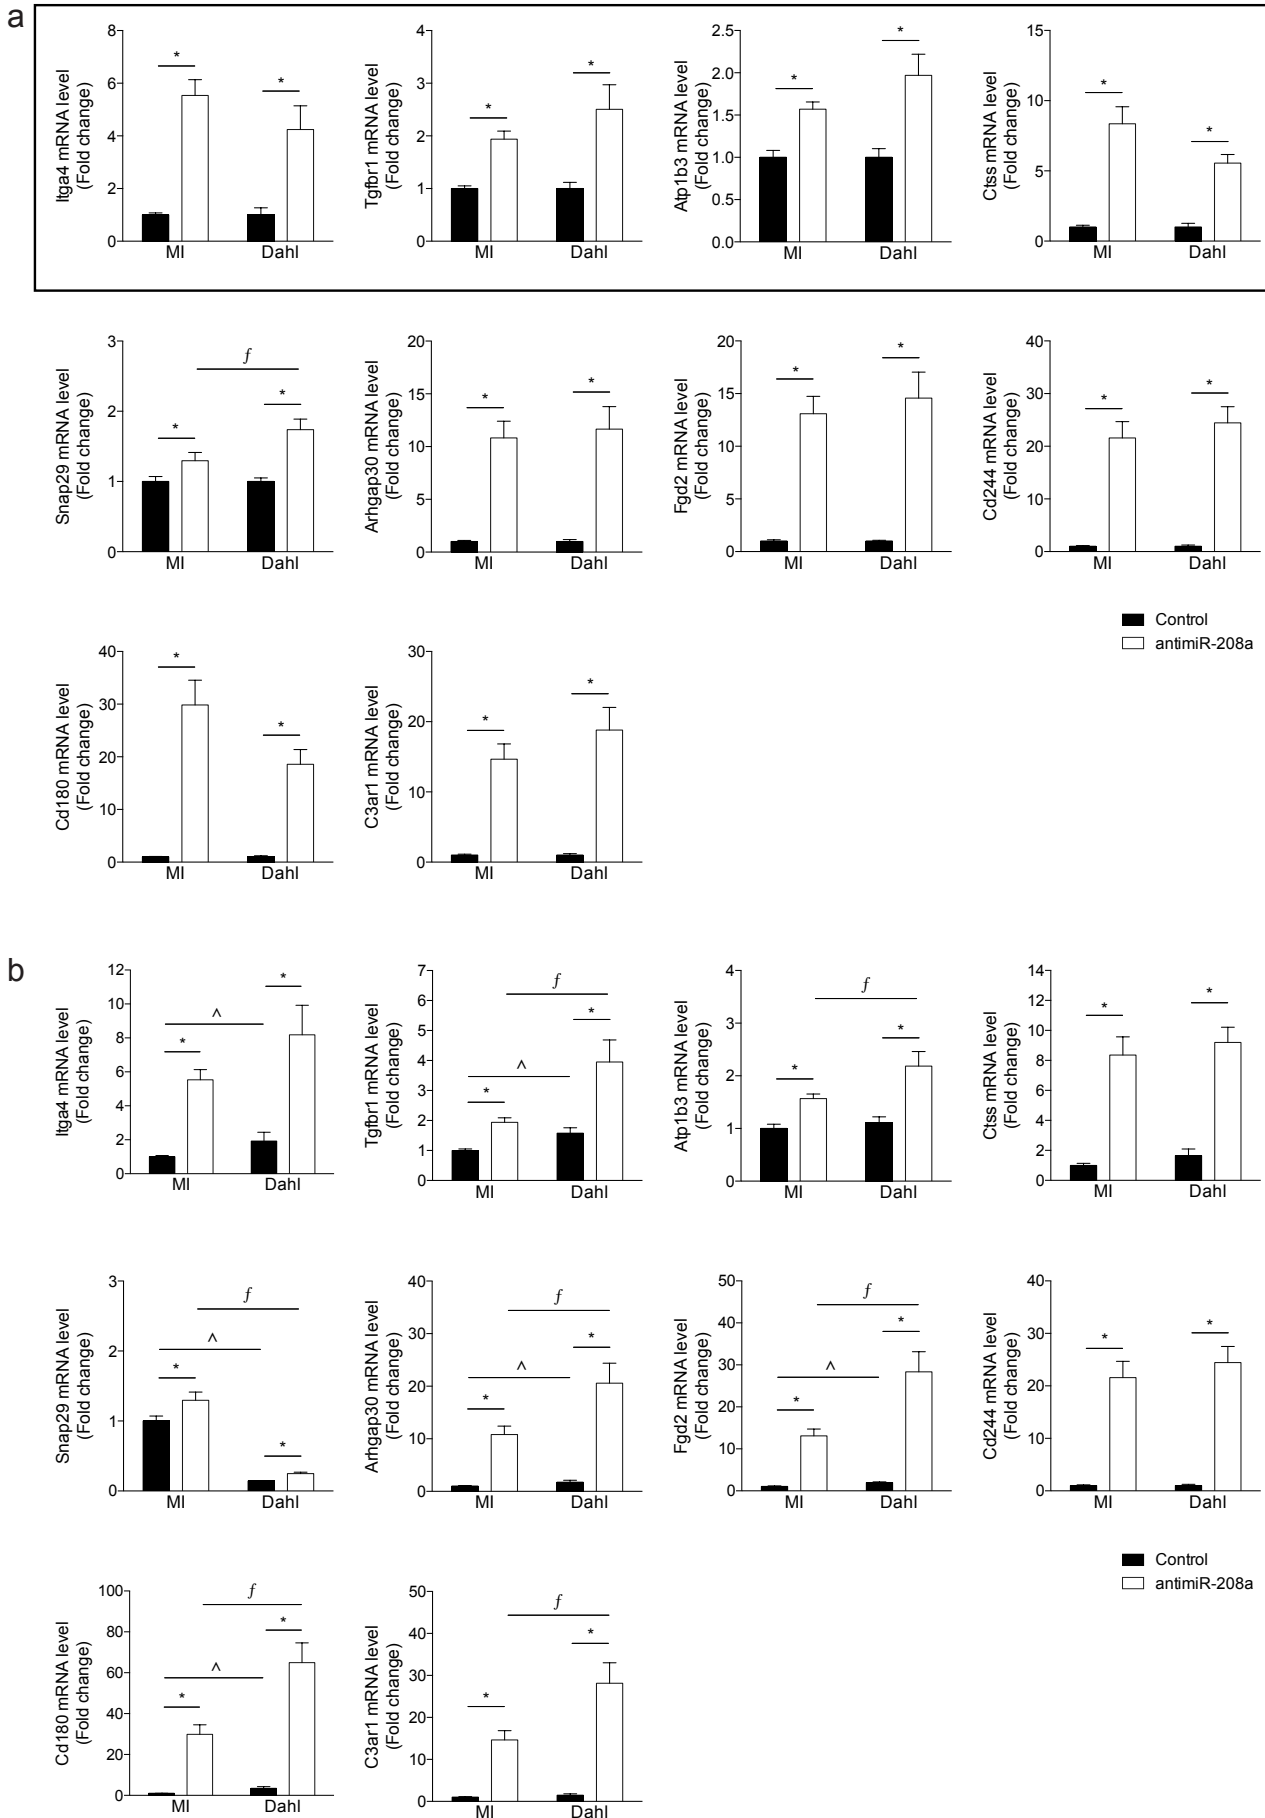

**Figure S5.** Real-time PCR analysis of miR-208a targets shown to be upregulated by gene array after anti-miR-208a treatment both after MI surgery and in Dahl rats. **(a)** Data are expressed as mean fold change  $\pm$  SEM for MI anti-miR-208a (n=15-17) over MI control (n=17-19) and Dahl anti-miR-208a (n=6-7) over Dahl control (n=5-6). **(b)** Data are expressed as mean fold change  $\pm$  SEM for MI anti-miR-208a (n=15-17), Dahl control (n=5-6) and Dahl anti-miR-208a (n=6-7) over MI control (n=17-19). \* indicates p < 0.05 for anti-miR-208a treatment versus control treatment; ^ indicates p < 0.05 for control treatment between models; f indicates p < 0.05 for anti-miR-208a treatment between models. Boxed graphs are shown in main figure 2f.

Figure S6

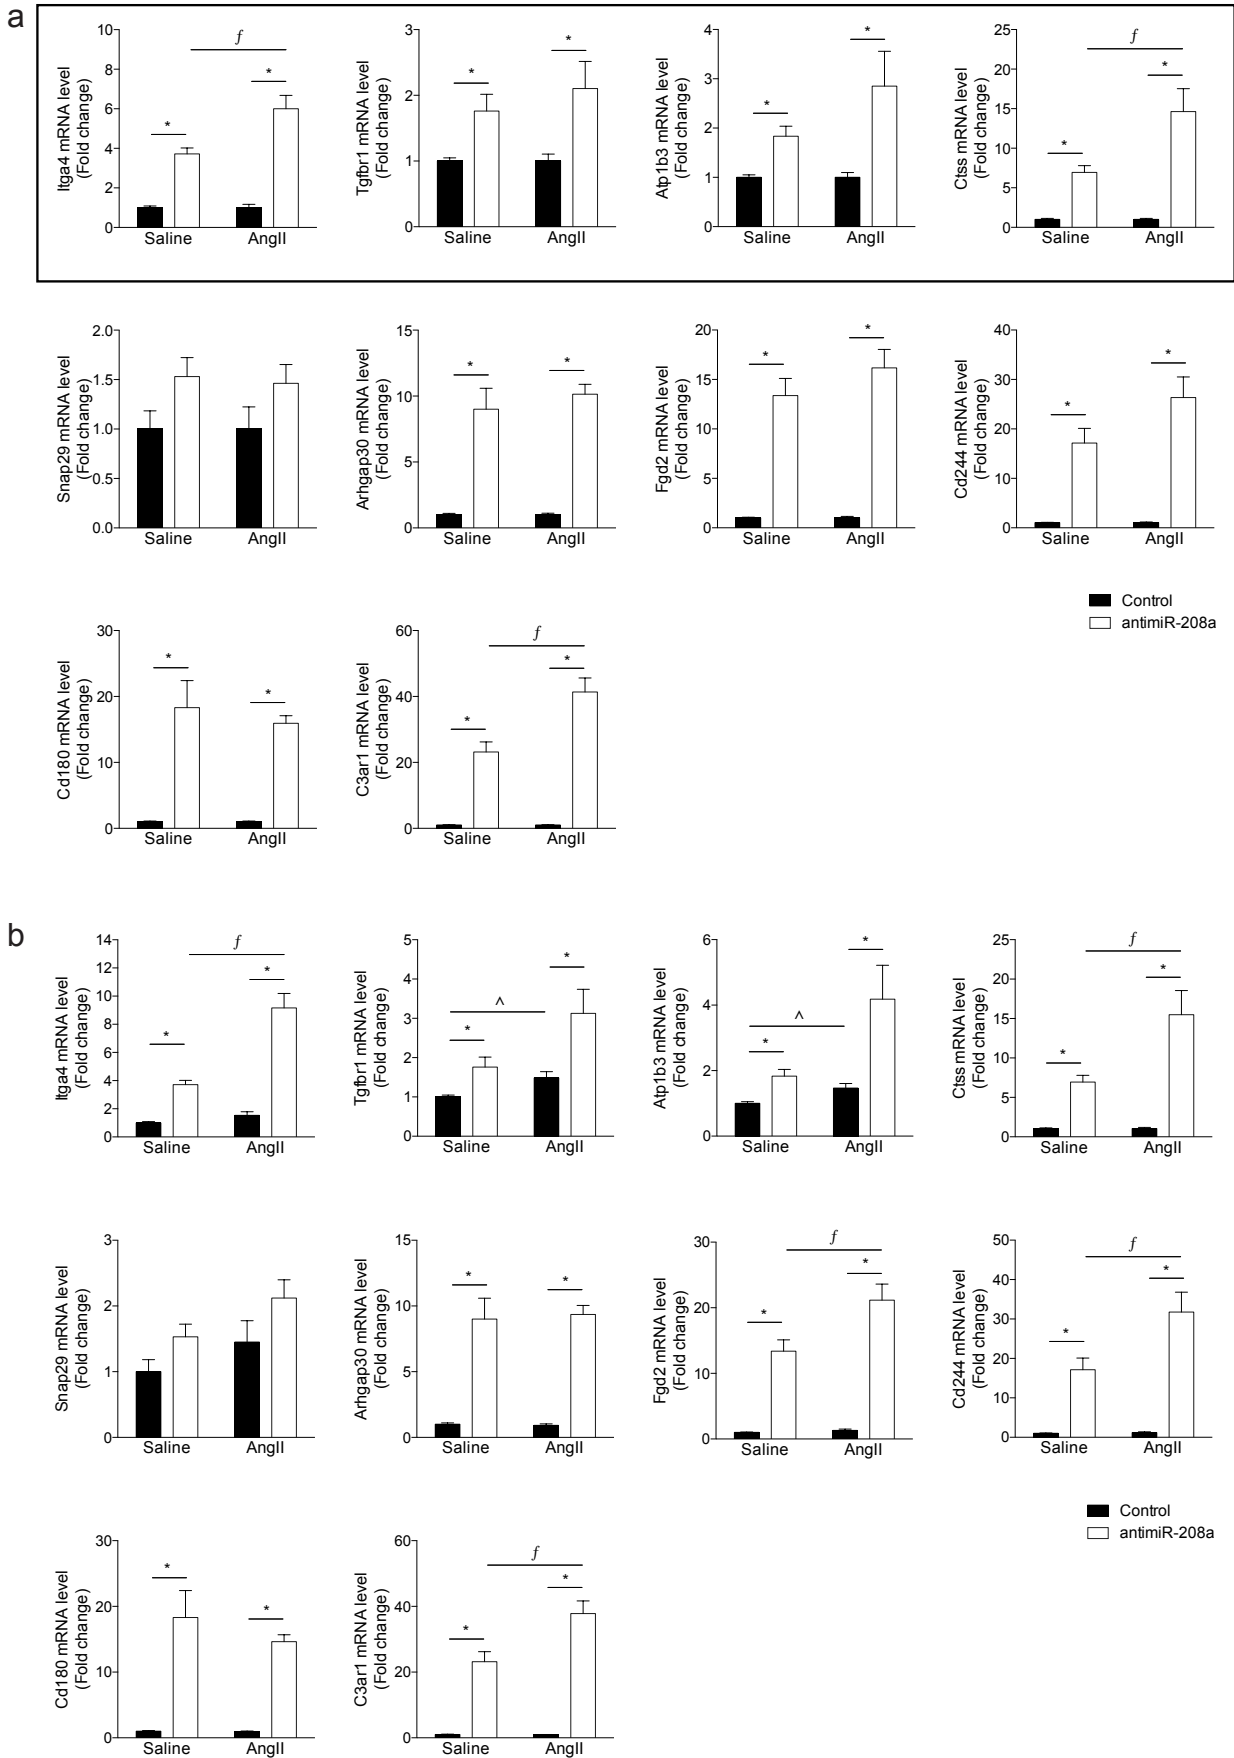

**Figure S6.** Real-time PCR analysis of miR-208a targets shown to be upregulated after anti-miR-208a treatment both after MI surgery and in Dahl rats, determined in rats subjected to Angiotensin II (AngII) or vehicle (Saline) infusion prior to treatment with anti-miR-208a or control. **(a)** Data are expressed as mean fold change  $\pm$  SEM for saline anti-miR-208a (n=5-6) over saline control (n=5-6) and AngII anti-miR-208a (n=5-6) over AngII control (n=5-6). **(b)** Data are expressed as mean fold change  $\pm$  SEM for saline anti-miR-208a (n=5-6), AngII control (n=5-6) and AngII anti-miR-208a (n=5-6) over saline control (n=5-6). \* indicates  $p < 0.05$  for anti-miR-208a treatment versus control treatment; ^ indicates  $p < 0.05$  for control treatment between saline and AngII; f indicates  $p < 0.05$  for anti-miR-208a treatment between saline and AngII. Boxed graphs were shown in main figure 2g.

Figure S7

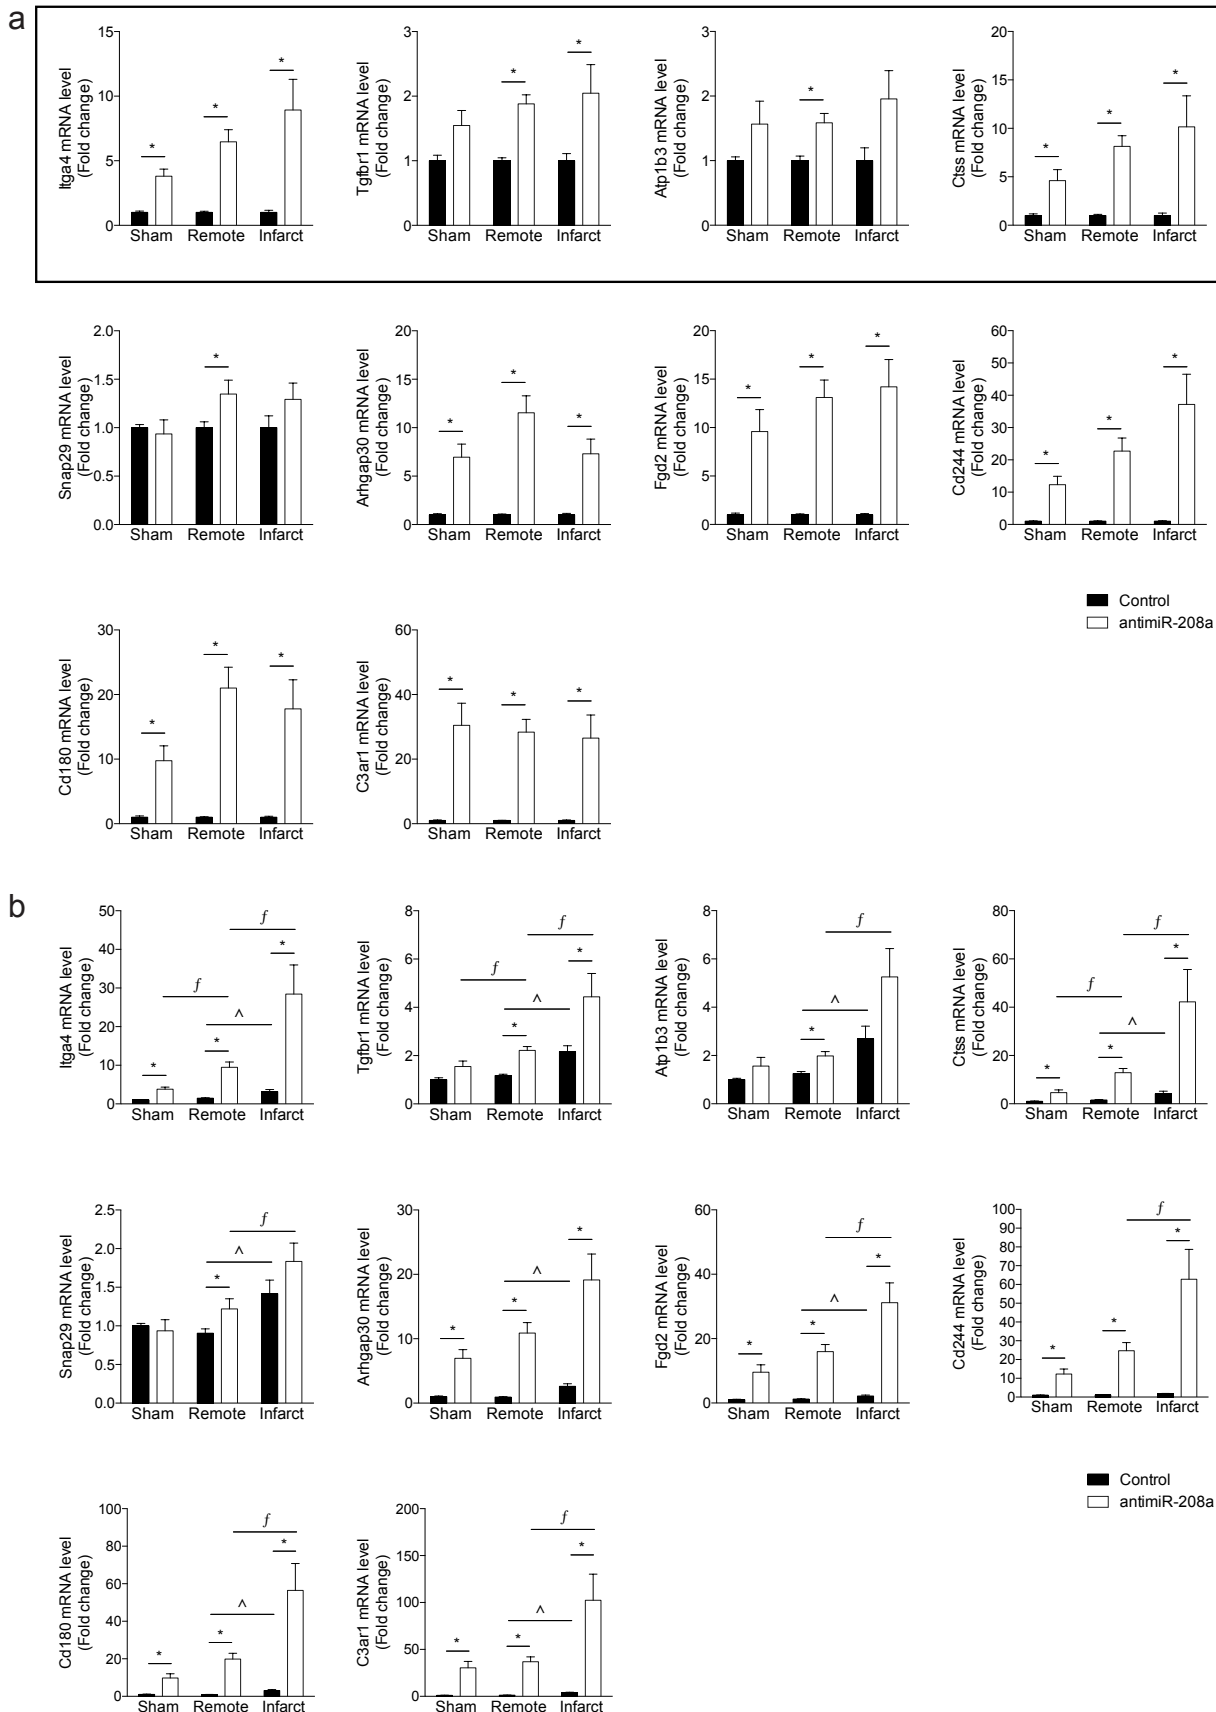

**Figure S7.** Real-time PCR analysis of miR-208a targets shown to be upregulated after anti-miR-208a treatment both after MI surgery and in Dahl rats, determined in sham-operated hearts or different regions of the MI-operated hearts (Remote, Infarct) after control or anti-miR-208a treatment. **(a)** Data are expressed as mean fold change  $\pm$  SEM for Sham anti-miR-208a ( $n=6-7$ ) over Sham control ( $n=5-6$ ), MI remote anti-miR-208a ( $n=15-17$ ) over MI remote control ( $n=17-19$ ), and MI infarct anti-miR-208a ( $n=15-17$ ) over MI infarct control ( $n=17-19$ ). **(b)** Data are expressed as mean fold change  $\pm$  SEM for Sham anti-miR-208a ( $n=6-7$ ), MI remote control ( $n=17-19$ ), MI remote anti-miR-208a ( $n=15-17$ ), MI infarct control ( $n=17-19$ ) and MI infarct anti-miR-208a ( $n=15-17$ ) over Sham control ( $n=5-6$ ). \* indicates  $p < 0.05$  for anti-miR-208a treatment versus control treatment; ^ indicates  $p < 0.05$  for control treatment between regions; *f* indicates  $p < 0.05$  for anti-miR-208a treatment between models. Boxed graphs were shown in main figure 3c.



Figure S8

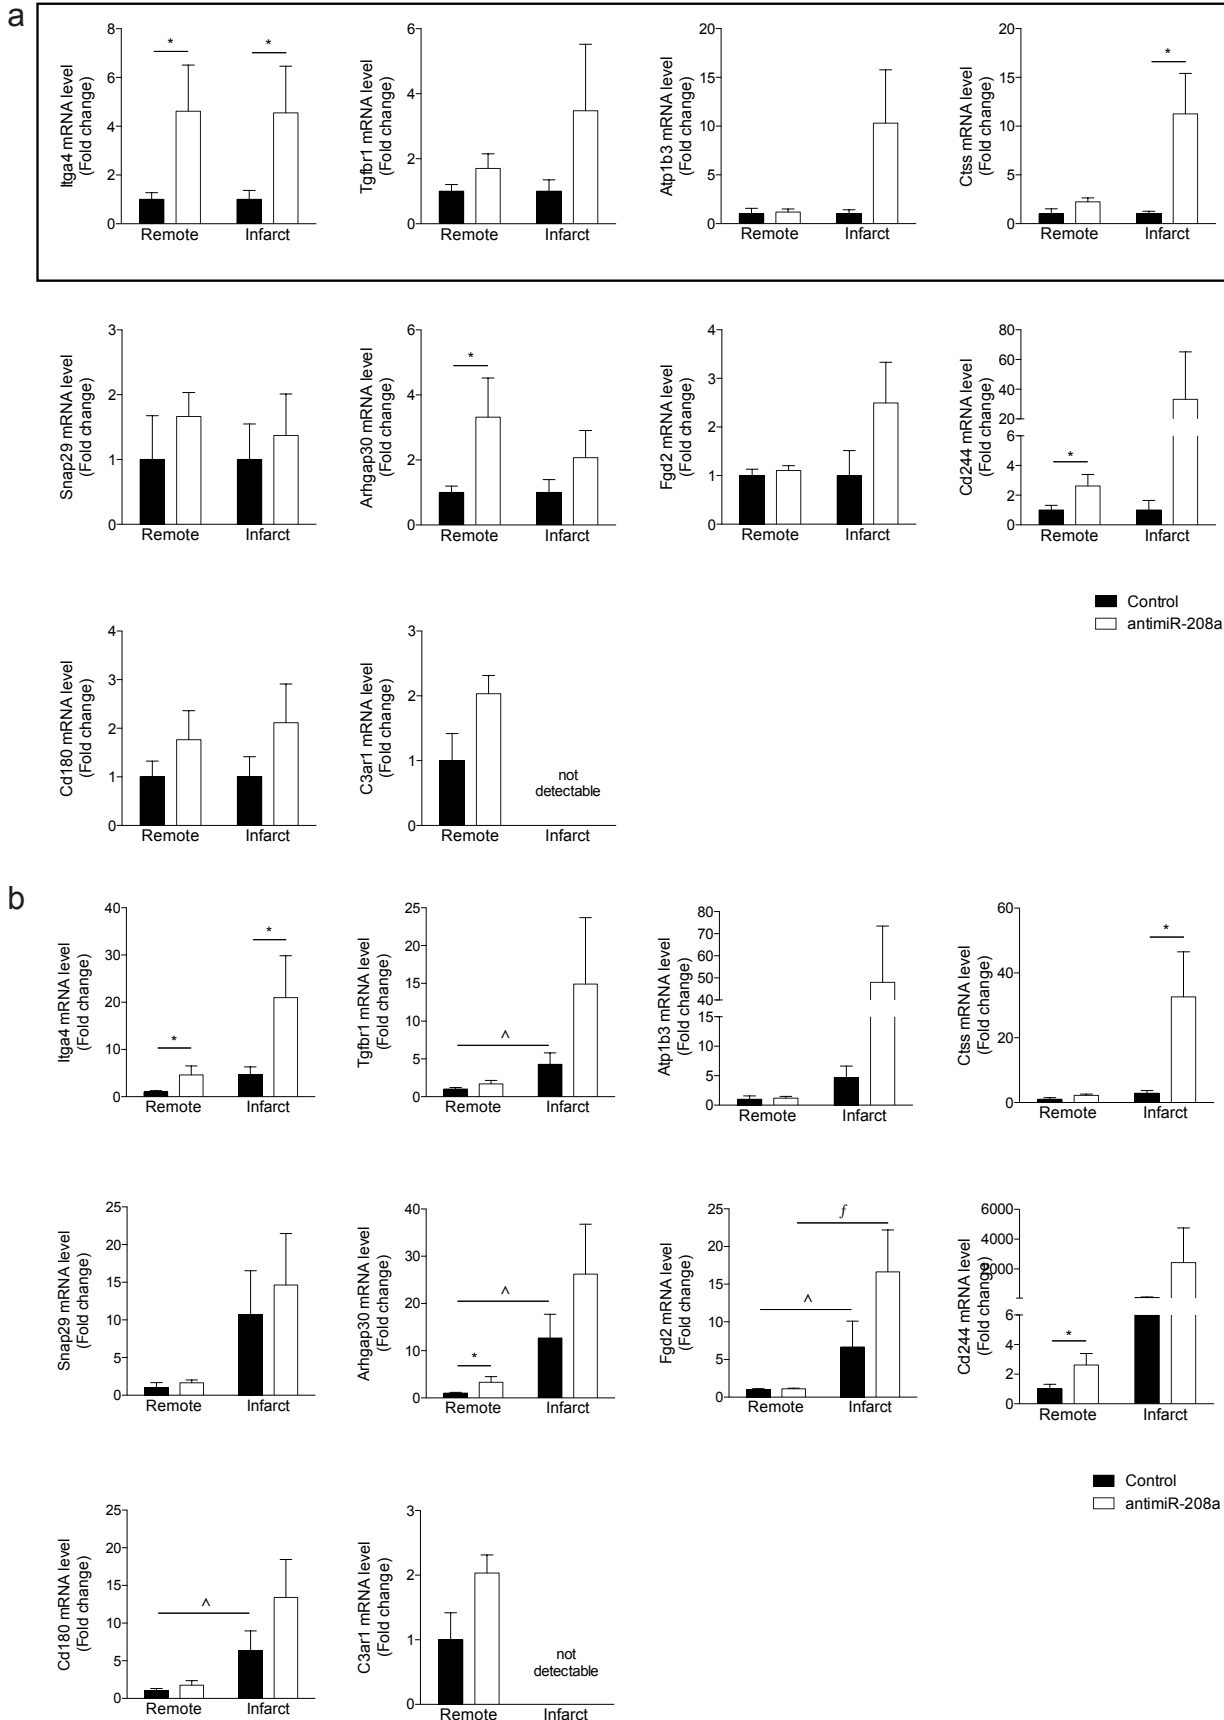

**Figure S8.** Real-time PCR analysis of miR-208a targets shown to be upregulated after anti-miR-208a treatment both after MI surgery and in Dahl rats, determined in different regions (Remote, Infarct) of pig hearts subjected to ischemia-reperfusion injury with subsequent control or anti-miR-208a treatment. (a) Data are expressed as mean fold change  $\pm$  SEM for IR remote anti-miR-208a (n=3-4) over IR remote control (n=6-7), and IR infarct anti-miR-208a (n=3-4) over IR infarct control (n=5-6). (b) Data are expressed as mean fold change  $\pm$  SEM for IR remote anti-miR-208a (n=3-4), IR infarct control (n=5-6) and IR infarct anti-miR-208a (n=3-4) over IR remote control (n=6-7). \* indicates  $p < 0.05$  for anti-miR-208a treatment versus control treatment; <sup>^</sup> indicates  $p < 0.05$  for control treatment between regions; <sup>f</sup> indicates  $p < 0.05$  for anti-miR-208a treatment between models. Boxed graphs were shown in main figure 3d.

**Table S1. Fold change of seed-matched miR-208a target genes that are significantly upregulated in response to antimiR-208a after sham or MI surgery.**

Table S1 data can be found as an Excel file in the online version of this manuscript.

**Table S2. Fold change of seed-matched miR-208a target genes that are significantly upregulated in response to antimiR-208a after MI surgery, or in high salt diet fed Dahl rats.**

Table S2 data can be found as an Excel file in the online version of this manuscript.

**Table S3. List of real-time PCR primers**

## Rat primers

| Gene     | Species   | Forward                  | Reverse                   |
|----------|-----------|--------------------------|---------------------------|
| Map3k8   | Rat (Rno) | CACGGAACACTCAGACTCCC     | ATGTCCAGGACTTCCGACAC      |
| Sash3    | Rat (Rno) | CCCTGTGTCAGAGGAGATGGGA   | TCACTGCCTGTTGATGTCTGG     |
| Vcpip    | Rat (Rno) | AGCCCACACTGTGAGACAAG     | GACCACACGTCTTCTCCATT      |
| Prkcb    | Rat (Rno) | ATGACCAAACACCCAGGCAA     | GTGTCTCGCTTGTCTCTAGCTT    |
| Evi2a    | Rat (Rno) | GAGCGCTCTGTAAGATACCAGT   | GGAACCCGAGGCAGTGATAC      |
| Pip4k2a  | Rat (Rno) | GACCATTACCAGCGAGGACG     | CCGTGACATTAAGCCGGTA       |
| Dynlt1   | Rat (Rno) | TCCACGGACGGGAGCTG        | TAGAAACGCTGGAACCGGAG      |
| Clecl4a3 | Rat (Rno) | TCTCCAGTGCTCTGATCATTCTG  | GGGCAACAGCTCCAGACTTT      |
| GPR174   | Rat (Rno) | ACCAAAAGGGCTGTGGTGTT     | GGCCAGTCGTGGTTCAAGTA      |
| Slc6a1   | Rat (Rno) | CAGCCAGTTCTGTACCGTGG     | GGCCAATCAGGTAGGACACG      |
| Runx2    | Rat (Rno) | CACAAGTGCGGTGCAAACCTT    | CCTTAAATATTACTGCATGGACTGT |
| Kif5a    | Rat (Rno) | GCGCAGGAAACTGTACACGA     | GTGATGGGCCTCACGATGAT      |
| Cdh9     | Rat (Rno) | AGGAAAGCTTCACACTGACCA    | CTGTCCAGTTTCTTTGCGGC      |
| Larp6    | Rat (Rno) | CAAGAAGGTGAAACACCTCACAC  | CCTTCCGGTGGTCCCTCATTG     |
| Cpox     | Rat (Rno) | CTGAGGAGAGGGCGGTATGT     | TCCCACCTTGCTGTTAGAGG      |
| Klre1    | Rat (Rno) | GGTCTGCCTTCTCCTGATGG     | GGATGATGGAGTCCCTCCTGA     |
| Plxnb2   | Rat (Rno) | ACTATGACGAGATCATCAATGCTT | GCCACCCACCTGAATCCTG       |
| Slc35b4  | Rat (Rno) | GAAGCCACCAGCTATCCCAAT    | GTTGGCAATCAGAGAGCCCGAT    |
| Atp1b3   | Rat (Rno) | CGAGTTAGTCCCAGATGGAGC    | TGTCGATATCCAACGTGCCG      |
| Snap29   | Rat (Rno) | GCAGAACTAGACTCGGTCCC     | CACGGACAGCTCATCTAGGTT     |
| Tgfr1    | Rat (Rno) | AGAACTCCCAACTACAGAAAAGCA | ATGACAGTGCGGTTATGGCA      |
| Fgd2     | Rat (Rno) | GTGCCCAGTCCAGGTGAG       | CTGGCAGGCCTGTATCCAA       |
| Itga4    | Rat (Rno) | GCTGTTACGGGTTTGTGAC      | TTGGAGCCATGCTAATGCCA      |
| Arhgap30 | Rat (Rno) | TGTCCCAAACACTACAGGACGC   | AAGCCCGAGGCTTCTATGTC      |
| Ctss     | Rat (Rno) | GGGCAGCTGAAGCTGAAAAC     | AAGCTTCGGTCATGAAGCCA      |
| Cd244    | Rat (Rno) | CGTCAAGAACGCACAAGTCAG    | AAGACCTGTTGATGAACTGAAAAG  |
| Cd180    | Rat (Rno) | CCTGGCACTCTACCAAACCTCA   | TCCAGTAAATCTGGCACCTGG     |
| C3ar1    | Rat (Rno) | TGCTCTTGACTGAGCAATGGA    | TGCCTGGCAGTCCCAATAAA      |
| Nppa     | Rat (Rno) | AGGCCATATTGGAGCAAATC     | CCTCATCTTCTACCGGCATC      |
| Myh7     | Rat (Rno) | GCTCACCTACCAGACAGAGGA    | CAGGCATCCTTAGGGTTGGG      |
| miR-208a | Rat (Rno) | ATAAGACGAGCAAAAAGCTTGT   | GAATCGAGCACCAGTTACG       |
| U6       | Rat (Rno) | TGGCCCTGCGCAAGGATG       | GAATCGAGCACCAGTTACG       |

## Pig primers

| Gene     | Species   | Forward               | Reverse                  |
|----------|-----------|-----------------------|--------------------------|
| Atp1b3   | Pig (Ssc) | TGGCCTCCTGGTTTGTCTT   | TCCAACGCTGACACTGGTTT     |
| Snap29   | Pig (Ssc) | GACTCAGACTGCATCCCTGG  | AGGGCAATGTCTTCAGACG      |
| Tgfr1    | Pig (Ssc) | GAGGCGACGGCATTACAGT   | GGTCAATTTAGCTATACACATGCT |
| Fgd2     | Pig (Ssc) | TCAGGAGCCTGAGGAGAAGA  | GCTCCTGGAAGAACACCTGG     |
| Itga4    | Pig (Ssc) | AACAGCTTACAGCTGGGTAGC | TGCCACAAGTCACAATGGAT     |
| Arhgap30 | Pig (Ssc) | AGAGGCTTACGGTTCAACG   | TTCCACCTCACCACCAGAGA     |
| Ctss     | Pig (Ssc) | AAGTAGCACGGCGTCTCATC  | CACTGGTCATGTCTCCAGG      |
| Cd244    | Pig (Ssc) | TCATGTTGAGAAGCCCCACC  | CAGCTCACCCCTTTGTACC      |
| Cd180    | Pig (Ssc) | TTGCTCGAGTCTGTGATGG   | CTGTTGGCTTCTTCTCAGTGC    |
| C3ar1    | Pig (Ssc) | AGGTTTGGGACGTTTAGCCA  | CCTGGCAACCCAGTAAGAA      |
